# Supplementary material
Source: MDPI journal article supplement (https://www.mdpi.com/2311-5637/8/6/276)
Supplement: s1 [file s1]

**Table S1.** Ingredients and contents of each component in *in vitro* cultivation medium.

| Ingredients                          | Contents      |
|--------------------------------------|---------------|
| <b>Artificial saliva</b>             |               |
| NaHCO <sub>3</sub>                   | 35 g          |
| NH <sub>4</sub> HCO <sub>3</sub>     | 4 g           |
| Distilled water                      | Up to 1000 mL |
| <b>Constant element solution</b>     |               |
| Na <sub>2</sub> HPO <sub>4</sub>     | 5.7 g         |
| KH <sub>2</sub> PO <sub>4</sub>      | 6.2 g         |
| MgSO <sub>4</sub> 7H <sub>2</sub> O  | 0.6 g         |
| Distilled water                      | Up to 1000 mL |
| <b>Trace element solution</b>        |               |
| CaCl <sub>2</sub> ·2H <sub>2</sub> O | 132 g         |
| MnCl <sub>2</sub> ·4H <sub>2</sub> O | 100 g         |
| CoCl <sub>2</sub> ·6H <sub>2</sub> O | 10 g          |
| FeCl <sub>3</sub> ·6H <sub>2</sub> O | 80 g          |
| Distilled water                      | Up to 1000 mL |
| <b>Resazurin solution</b>            |               |
| Resazurin                            | 1 g           |
| Distilled water                      | Up to 1000 mL |
| <b>Reducing agent solution</b>       |               |
| Na <sub>2</sub> S·9H <sub>2</sub> O  | 6.25 g        |
| NaOH                                 | 1.6 g         |
| Distilled water                      | Up to 1000 mL |
